# Supplementary material for: Incidental Findings on Brain MRI in the General Population
Source: Atypon-hosted journal article supplement (doi:10.1056/nejmoa070972), 2007-10-31
Supplement: nejm_vernooij_1821sa1.pdf [file nejm_vernooij_1821sa1.pdf]

## Supplementary Appendix

This appendix has been provided by the authors to give readers additional information about their work.

Supplement to: Vernooij MW, Ikram MA, Tanghe HL, et al. Incidental findings on brain MRI in the general population. *N Engl J Med* 2007;357:1821-8.

| Imaging diagnosis                  | Case definition based on MRI characteristics                                                                                                                                                                                                                                                                                                                                                                                                                                                                                                                                                                                                                                                                              |
|------------------------------------|---------------------------------------------------------------------------------------------------------------------------------------------------------------------------------------------------------------------------------------------------------------------------------------------------------------------------------------------------------------------------------------------------------------------------------------------------------------------------------------------------------------------------------------------------------------------------------------------------------------------------------------------------------------------------------------------------------------------------|
| <i>Asymptomatic brain infarcts</i> |                                                                                                                                                                                                                                                                                                                                                                                                                                                                                                                                                                                                                                                                                                                           |
| Lacunar infarct                    | <p>Focal parenchymal lesion <math>\geq 3</math> mm and <math>&lt; 15</math> mm in size, with the same signal characteristics as cerebrospinal fluid on all sequences, and -when located supratentorially- with a hyperintense rim on the FLAIR images.<sup>1-</sup></p> <p><sup>3</sup> No involvement of cortical grey matter. Commonly located in the basal ganglia, internal capsule, pons and corona radiata. Differentiation from Virchow-Robin (VR) spaces is based on signal intensity (absence of hyperintense rim on FLAIR images), shape (VR-spaces are more linear or lobulated in shape) and location (VR-spaces are often located around anterior commissure or near vertex of the brain).<sup>4,5</sup></p> |
| Subcortical infarct                | Same MRI characteristics as lacunar infarct, but $\geq 15$ mm in size.                                                                                                                                                                                                                                                                                                                                                                                                                                                                                                                                                                                                                                                    |
| Cortical infarct                   | <p>Focal parenchymal lesion with involvement of cortical grey matter, with the same signal characteristics as cerebrospinal fluid on all sequences, and -when located supratentorially- with a hyperintense rim on the FLAIR images.<sup>1-3</sup> Tissue loss of variable magnitude present, visible as prominent adjacent sulci and ipsilateral ventricular enlargement.<sup>6</sup></p>                                                                                                                                                                                                                                                                                                                                |
| <i>Primary tumors, benign</i>      |                                                                                                                                                                                                                                                                                                                                                                                                                                                                                                                                                                                                                                                                                                                           |
| Meningioma                         | <p>Extra-axial lesion. Iso- or hypointense to grey matter on T1-weighted images, variable signal intensity on PD-weighted images. Calcifications (hypointense on T1-weighted and PD-weighted images) within lesion and/or hyperostosis of underlying bone may be present. Usually broad dural basis. When large, these lesions may cause moderate vasogenic edema in underlying brain tissue.<sup>6</sup></p>                                                                                                                                                                                                                                                                                                             |
| Vestibular schwannoma              | Extra-axial lesion. Iso- or hypointense to grey matter on T1-weighted                                                                                                                                                                                                                                                                                                                                                                                                                                                                                                                                                                                                                                                     |

images. Located in the internal auditory canal, with variable extension into the cerebellopontine angle. Often with widening of the internal auditory canal when large. Typical "ice cream cone" appearance.<sup>6</sup> Can show cystic changes (visible as high signal intensity on PD-weighted images).<sup>7</sup>

Intracranial lipoma

Lesion with the same signal characteristics as subcutaneous fat on all sequences. Sometimes with intralesional vessels seen as flow voids.<sup>8, 9</sup>

Trigeminal schwannoma

Extra-axial lesion with signal characteristics similar to vestibular schwannoma except the course follows that of the 5th cranial nerve.<sup>6, 10</sup>

Pituitary macroadenoma

Intrasellar mass, extending suprasellar and/or parasellar, frequently causing deviation of the pituitary stalk. May extend upward toward the optic chiasm. The normal pituitary gland may not be identified. Signal intensity usually isointense to grey matter on all sequences, but the lesion may show cystic changes (cystic macroadenoma; high signal intensity on PD-weighted images).<sup>6</sup>

*Primary tumors, malignant*

Low-grade glioma

Diffuse lesion with mass effect and signal changes: hypointense relative to surrounding brain on T1-weighted images, hyperintense on PD-weighted and FLAIR images. No signs of necrosis or hemorrhage.<sup>6</sup>

*Other findings*

Aneurysm

The presence of aneurysms is evaluated on PD-weighted images, on which arterial structures are visualized as flow voids (black). Aneurysms are defined as blind-ending, well delineated focal arterial out-pouchings with a saccular shape. Location usually in cavernous internal carotid artery or circle of Willis. Commonly located at vessel bifurcations.<sup>6</sup>

|                              |                                                                                                                                                                                                                                                                                                                                                                                                                                                                     |
|------------------------------|---------------------------------------------------------------------------------------------------------------------------------------------------------------------------------------------------------------------------------------------------------------------------------------------------------------------------------------------------------------------------------------------------------------------------------------------------------------------|
| Cavernous angioma            | "Popcorn-like", smoothly circumscribed, well-delineated parenchymal lesion. Complex reticulated core of mixed signal intensities, representing hemorrhage in various stages of evolution. Low-signal-intensity hemosiderin rim completely surrounding the lesion on both T1-weighted and PD-weighted images. On T2* GRE imaging, paramagnetic properties of hemosiderin cause a focus of signal loss. No feeding artery or draining vein demonstrated. <sup>6</sup> |
| Metastases                   | Multifocal parenchymal round lesions with mass effect. Generally iso- to mildly hypointense on T1-weighted images, hyperintense on PD-weighted images. Variable amount of edema surrounding each lesion. Hemorrhage may be present in some lesions (causing susceptibility artifacts on T2* GRE images). <sup>6</sup>                                                                                                                                               |
| Chronic subdural<br>hematoma | Crescent-shaped extra-axial fluid collection. Hyperintense signal intensity on PD-weighted images. Often not homogeneous in signal intensity due to presence of blood in different stages, with septae separating different blood products. The extra-axial fluid collection does not cross dural attachments, but does cross sutures. <sup>6</sup>                                                                                                                 |
| Arachnoid cyst               | Sharply-demarcated well-defined extra-axial cystic lesion exhibiting isointense signal to cerebrospinal fluid on all sequences (including on FLAIR images). No internal architecture. Typical locations are temporal or infratentorial (cerebellopontine angle, cisterna magna). <sup>6</sup>                                                                                                                                                                       |
| Chiari I malformation        | Tonsillar herniation extending more than 5 mm below the foramen magnum. The plane of the foramen magnum is defined on sagittal T1-weighted images by a line connecting the basion and opisthion, and degree of tonsillar herniation is measured perpendicular from this line to                                                                                                                                                                                     |

|                            |                                                                                                                                                                                                                                                                                                   |
|----------------------------|---------------------------------------------------------------------------------------------------------------------------------------------------------------------------------------------------------------------------------------------------------------------------------------------------|
|                            | the most inferior aspect of the cerebellar tonsils visible on all sections. <sup>11</sup>                                                                                                                                                                                                         |
| Major vessel stenosis      | Absence of flow void on T1-weighted and PD-weighted images in carotid or vertebral artery. <sup>12</sup>                                                                                                                                                                                          |
| Extra-cranial dermoid cyst | Extra-cranial lesion usually located around bony sutures (typical near superolateral orbital rim). Well-defined lesion, usually hypointense on T1-weighted and hyperintense on PD-weighted images. May exhibit a fat-fluid level. Shows bony remodelling without destruction. <sup>13</sup>       |
| Fibrous dysplasia          | Bony expansion with intact but thickened cortex. Low signal intensity on both T1-weighted and PD-weighted images, as well as on FLAIR images. <sup>6, 14</sup> No extension into soft tissue. Typical locations in the skull are frontal, sphenoid, maxillary, and ethmoidal bones. <sup>14</sup> |

---

FLAIR fluid-attenuated inversion recovery; PD proton density; GRE gradient-recalled echo.

Note that the PD-weighted sequence used in our MR protocol is a fast spin echo sequence with a long repetition time (12,300 ms), which results in hyperintense signal of (cerebrospinal) fluid, comparable to the tissue-fluid contrast seen in T2-weighted sequences.

## References

1. Kruit MC, Launer LJ, Ferrari MD, van Buchem MA. Infarcts in the posterior circulation territory in migraine. The population-based MRI CAMERA study. *Brain* 2005;128:2068-77.
2. Vermeer SE, Koudstaal PJ, Oudkerk M, Hofman A, Breteler MM. Prevalence and risk factors of silent brain infarcts in the population-based Rotterdam Scan Study. *Stroke* 2002;33:21-5.
3. Bryan RN, Cai J, Burke G, et al. Prevalence and anatomic characteristics of infarct-like lesions on MR images of middle-aged adults: the atherosclerosis risk in communities study. *AJNR Am J Neuroradiol* 1999;20:1273-80.
4. Bokura H, Kobayashi S, Yamaguchi S. Distinguishing silent lacunar infarction from enlarged Virchow-Robin spaces: a magnetic resonance imaging and pathological study. *J Neurol* 1998;245:116-22.
5. Barkhof F. Enlarged Virchow-Robin spaces: do they matter? *J Neurol Neurosurg Psychiatry* 2004;75:1516-7.
6. Osborn AG. *Diagnostic Neuroradiology*. 1st ed. St. Louis: Mosby; 1994.
7. Kameyama S, Tanaka R, Kawaguchi T, Fukuda M, Oyanagi K. Cystic acoustic neurinomas: studies of 14 cases. *Acta Neurochir (Wien)* 1996;138:695-9.
8. Yilmazlar S, Kocaeli H, Aksoy K. Quadrigeminal cistern lipoma. *J Clin Neurosci* 2005;12:596-9.
9. Dahlen RT, Johnson CE, Harnsberger HR, et al. CT and MR imaging characteristics of intravestibular lipoma. *AJNR Am J Neuroradiol* 2002;23:1413-7.
10. Majoie CB, Hulsmans FJ, Castelijns JA, et al. Primary nerve-sheath tumours of the trigeminal nerve: clinical and MRI findings. *Neuroradiology* 1999;41:100-8.

11. Meadows J, Kraut M, Guarnieri M, Haroun RI, Carson BS. Asymptomatic Chiari Type I malformations identified on magnetic resonance imaging. *J Neurosurg* 2000;92:920-6.
12. Lane JI, Flanders AE, Doan HT, Bell RD. Assessment of carotid artery patency on routine spin-echo MR imaging of the brain. *AJNR Am J Neuroradiol* 1991;12:819-26.
13. Mafee MF. Orbit: Embryology, Anatomy, and Pathology. In: Som PM, Curtin HD, eds. *Head and Neck Imaging*. St. Louis: Mosby; 2003:563-8.
14. Amaral L, Chiurciu M, Almeida JR, Ferreira NF, Mendonca R, Lima SS. MR imaging for evaluation of lesions of the cranial vault: a pictorial essay. *Arq Neuropsiquiatr* 2003;61:521-32.
